# Supplementary material
Source: Springer Nature journal article supplement (https://www.springermedizin.de/resource/supplementary/12874_2012_866_MOESM2_ESM.pdf/9432698)
Supplement: MOESM2 [file 9432698]

Interaction between the education and environment strategies Educational intervention doses - first year

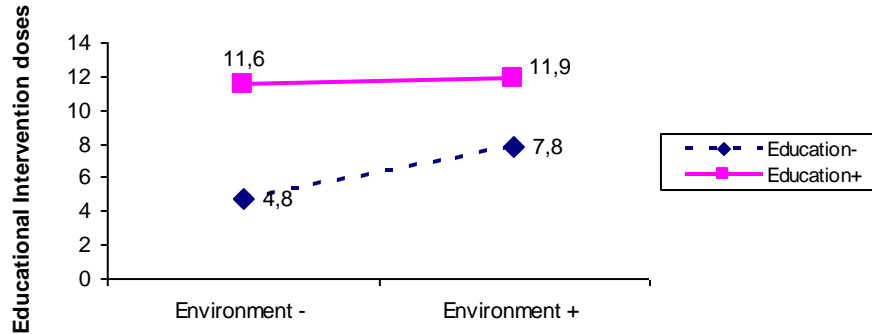

Interaction between the education and environment strategies Educational intervention doses - second year

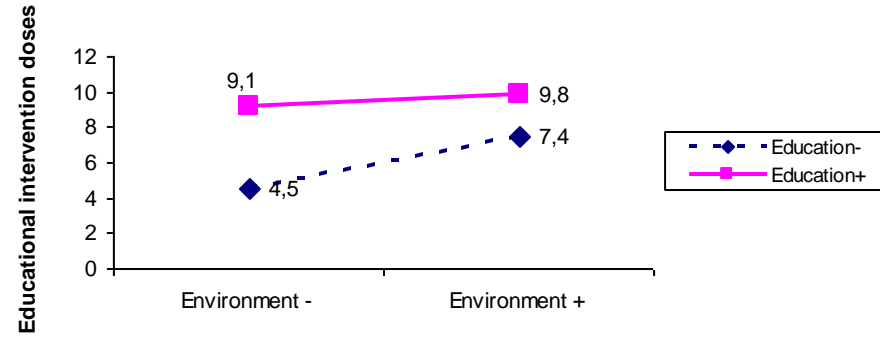

Interaction between the education and environment strategies Environmental intervention doses - first year

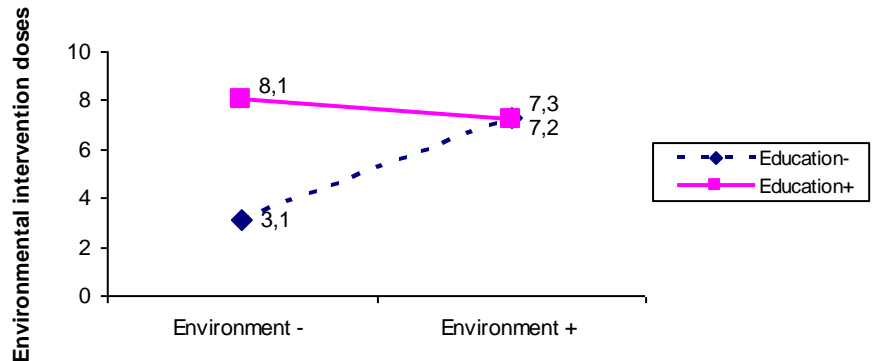

Interaction between the education and environment strategies Environmental intervention doses - second year

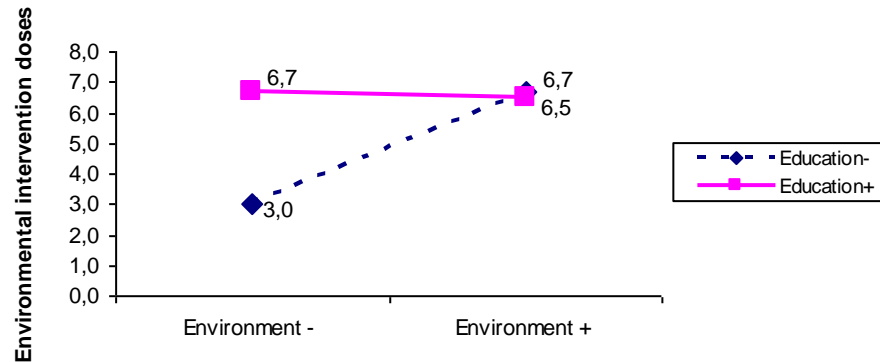

- : PRALIMAP strategy not assigned  
 +: PRALIMAP strategy assigned
